# Supplementary material
Source: PubMed Central journal article supplement (PMC4531387)

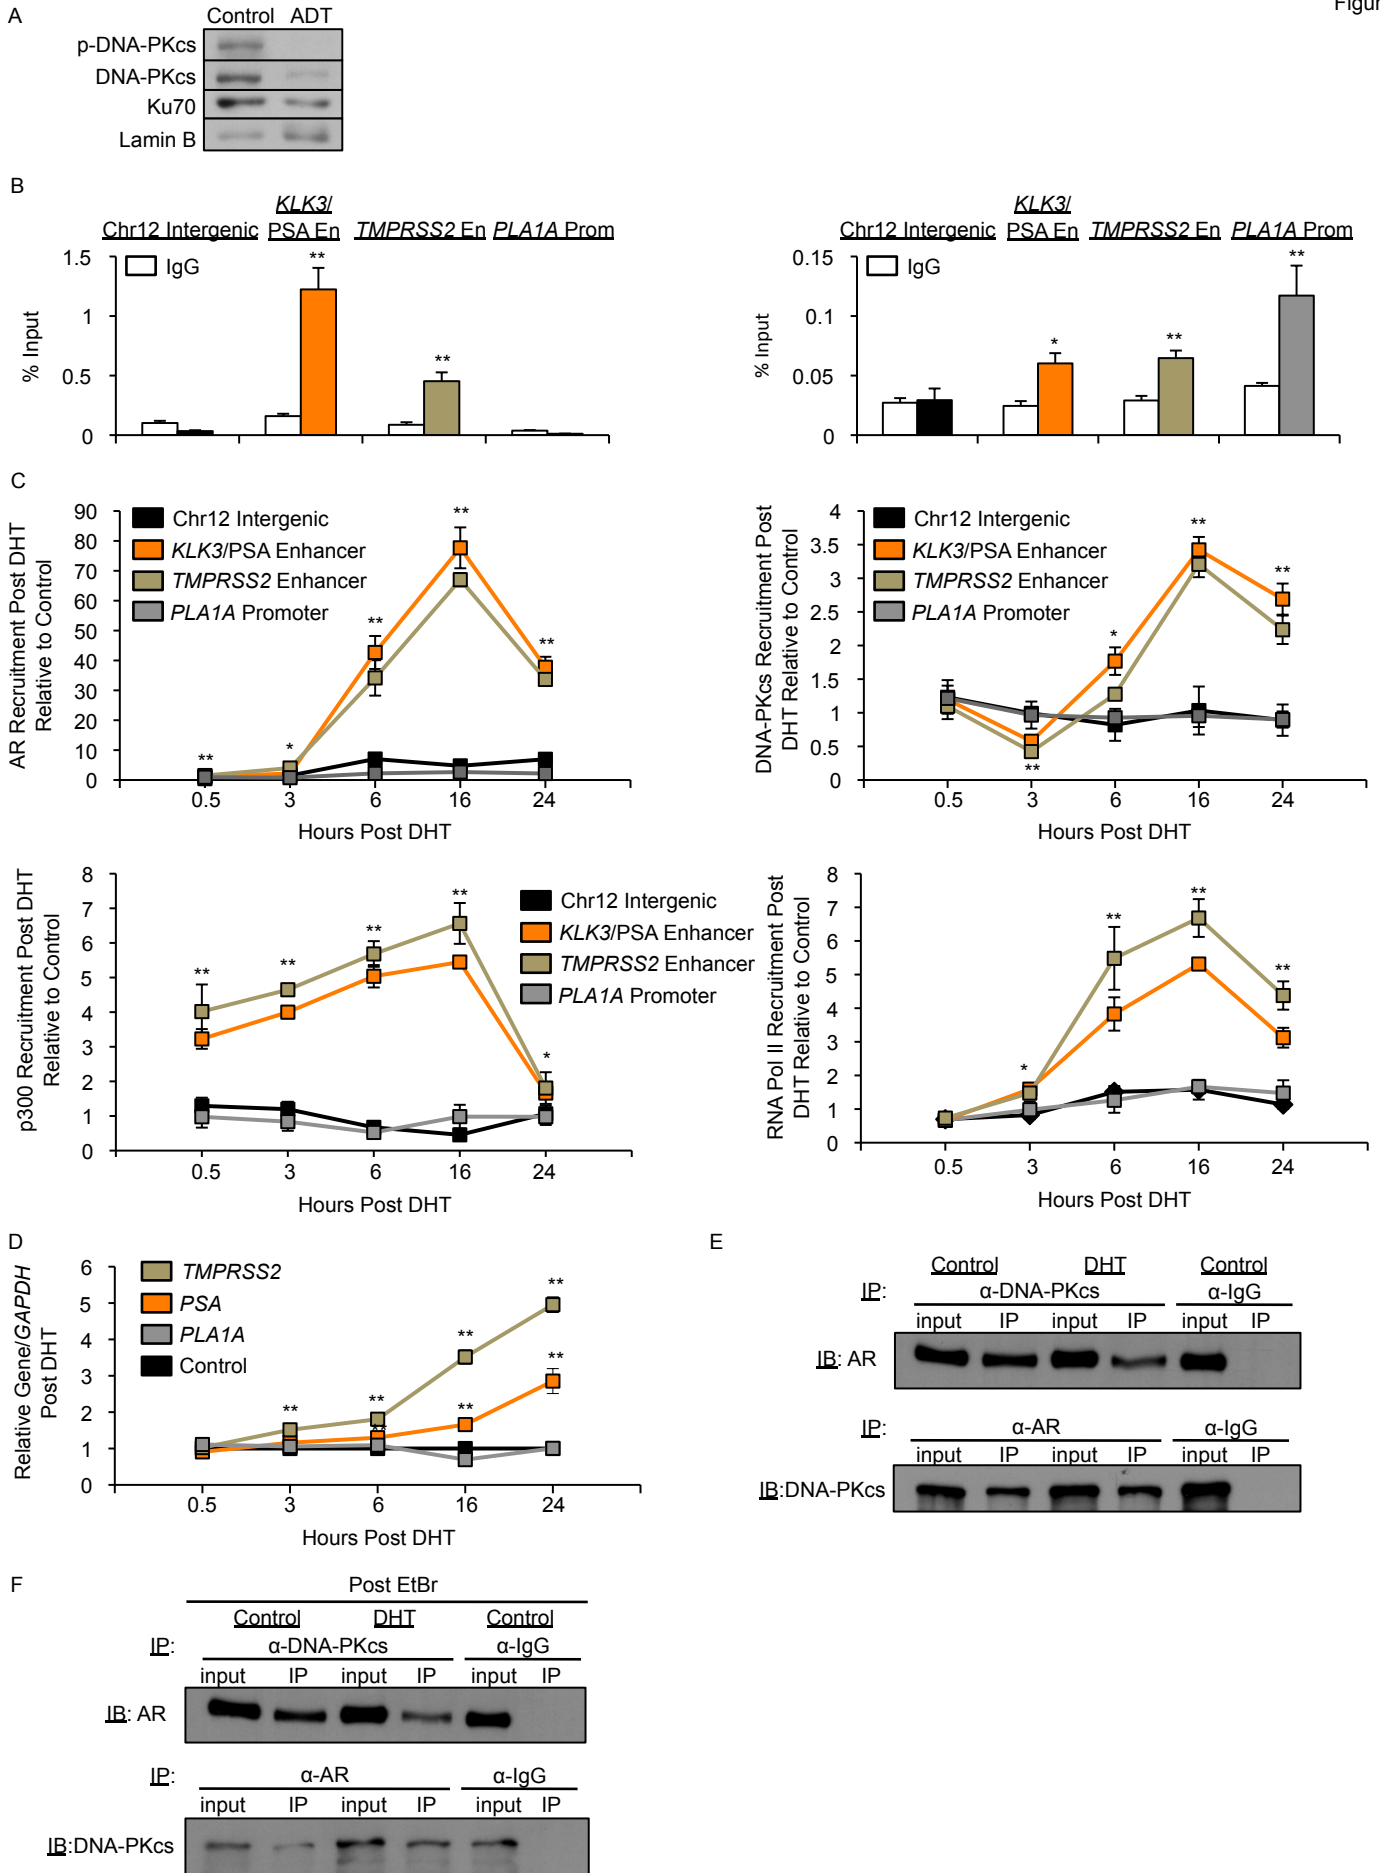

Figure 2

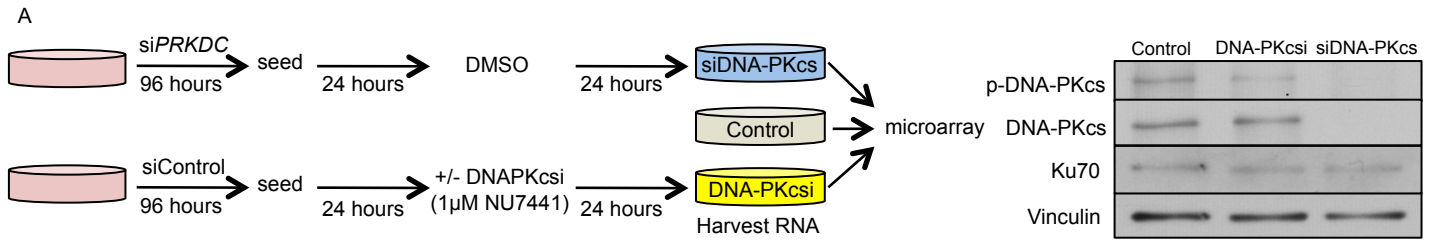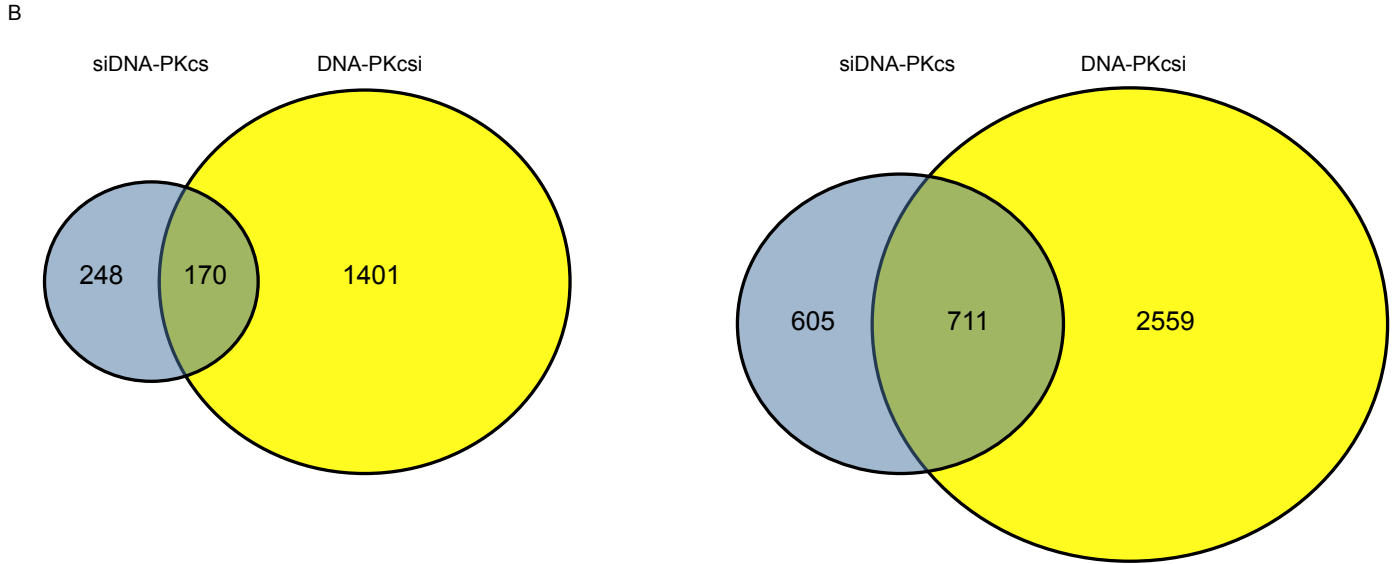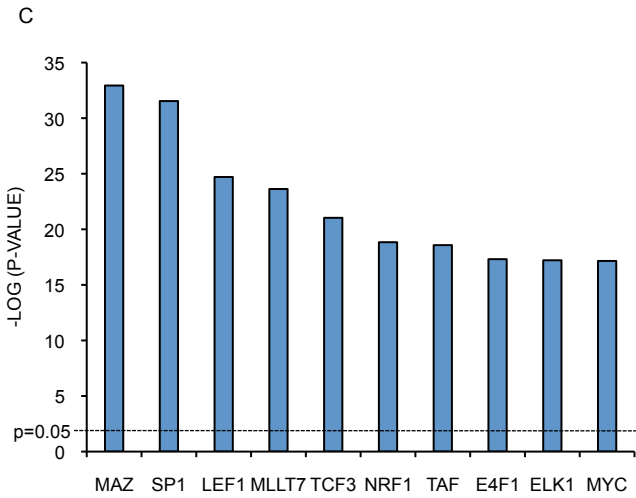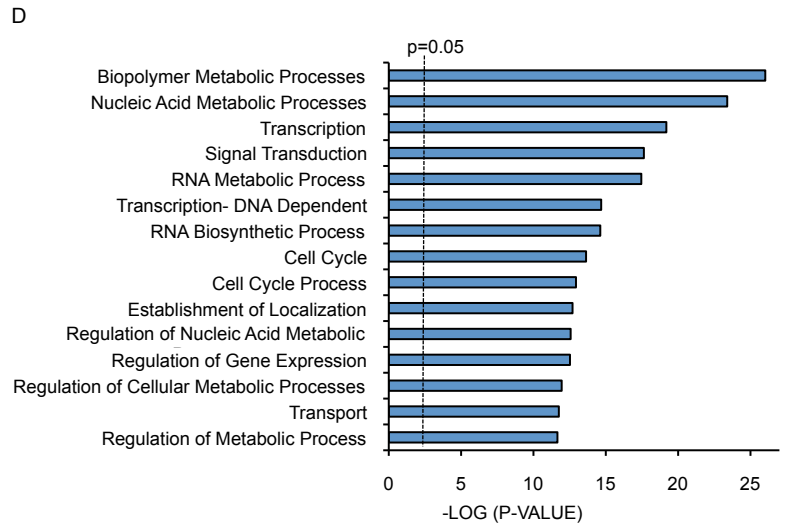

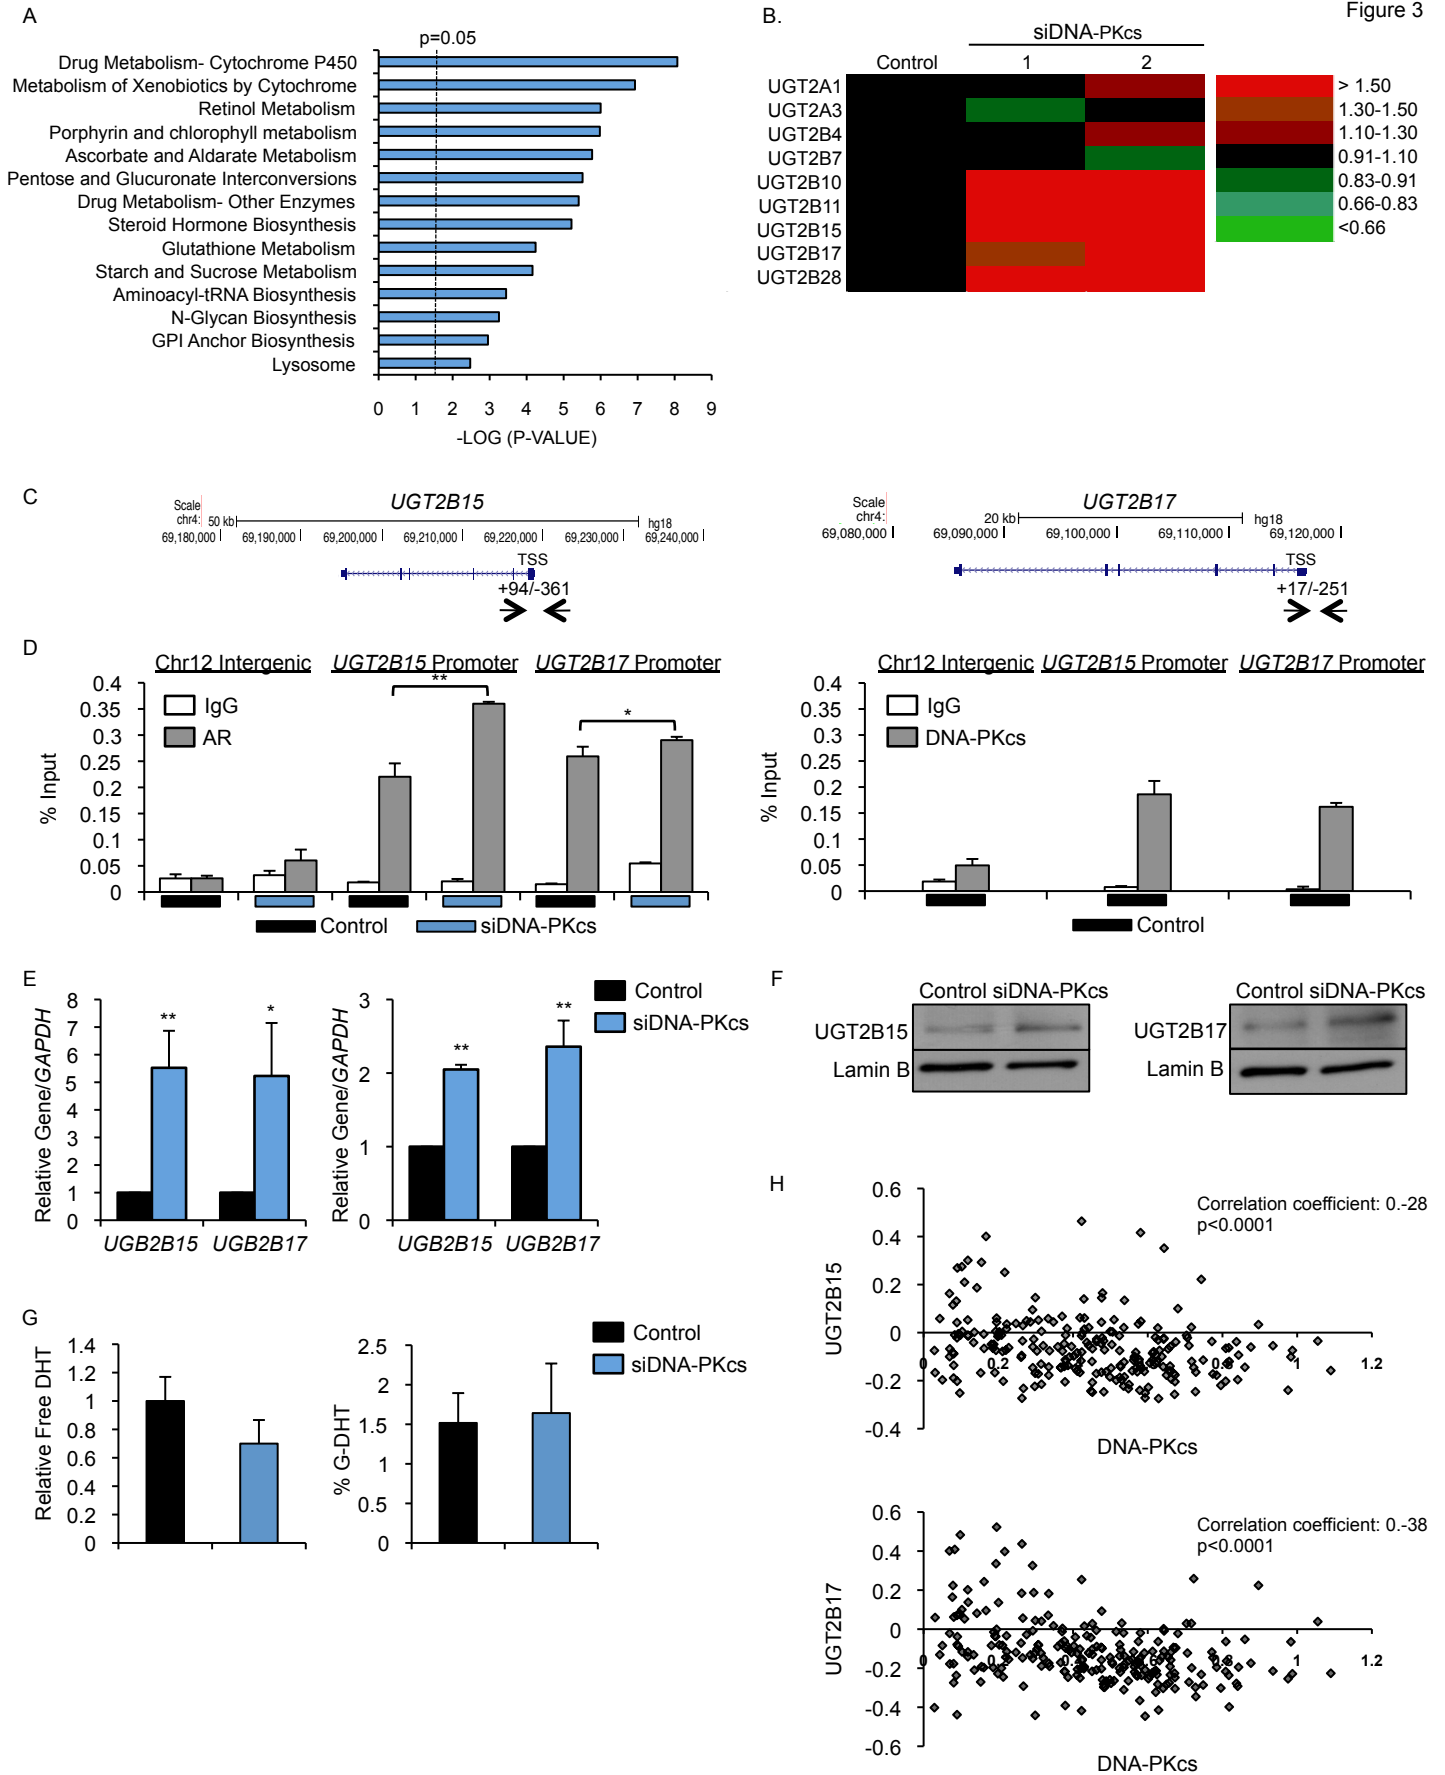

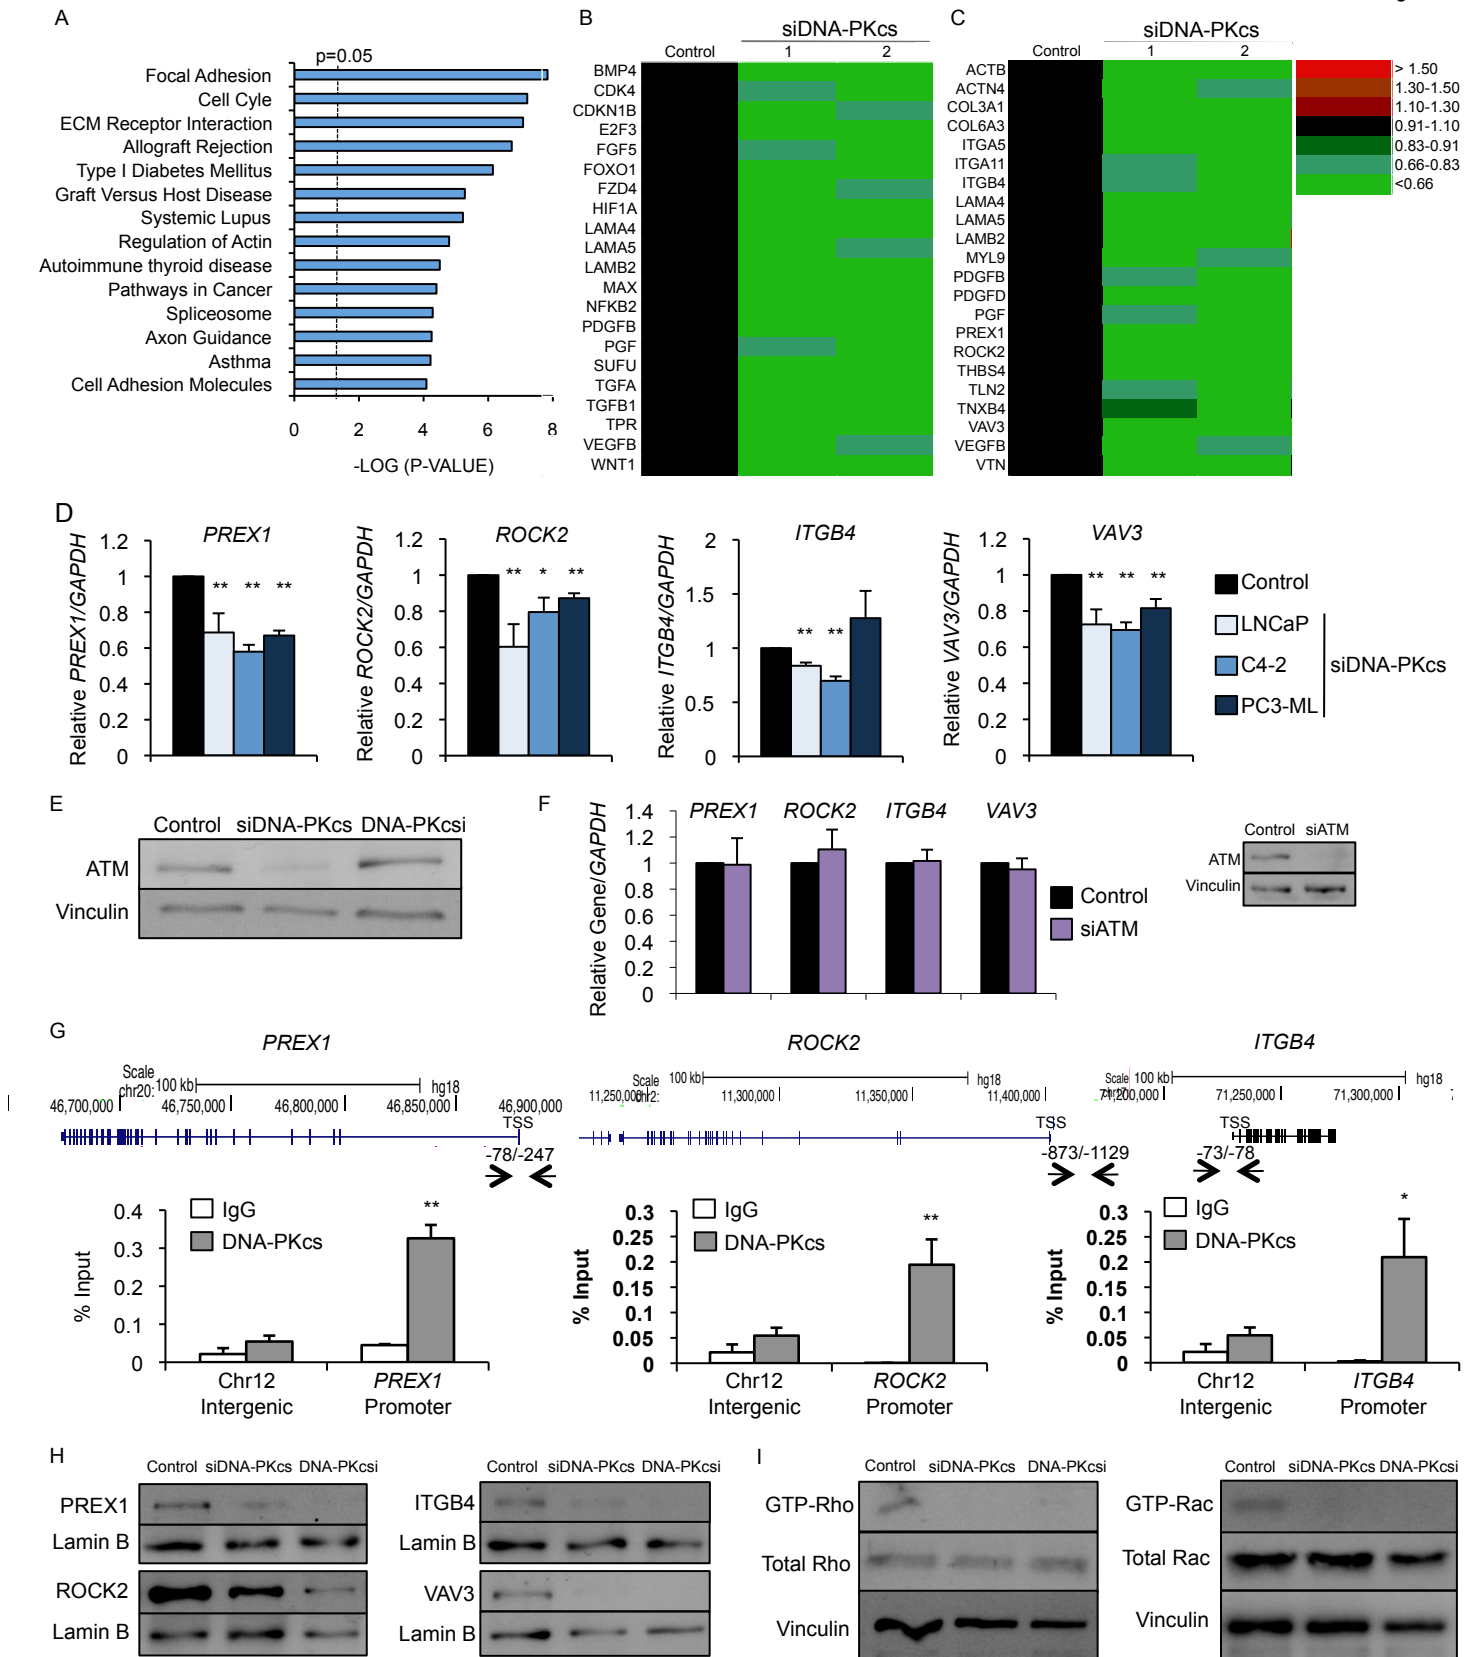

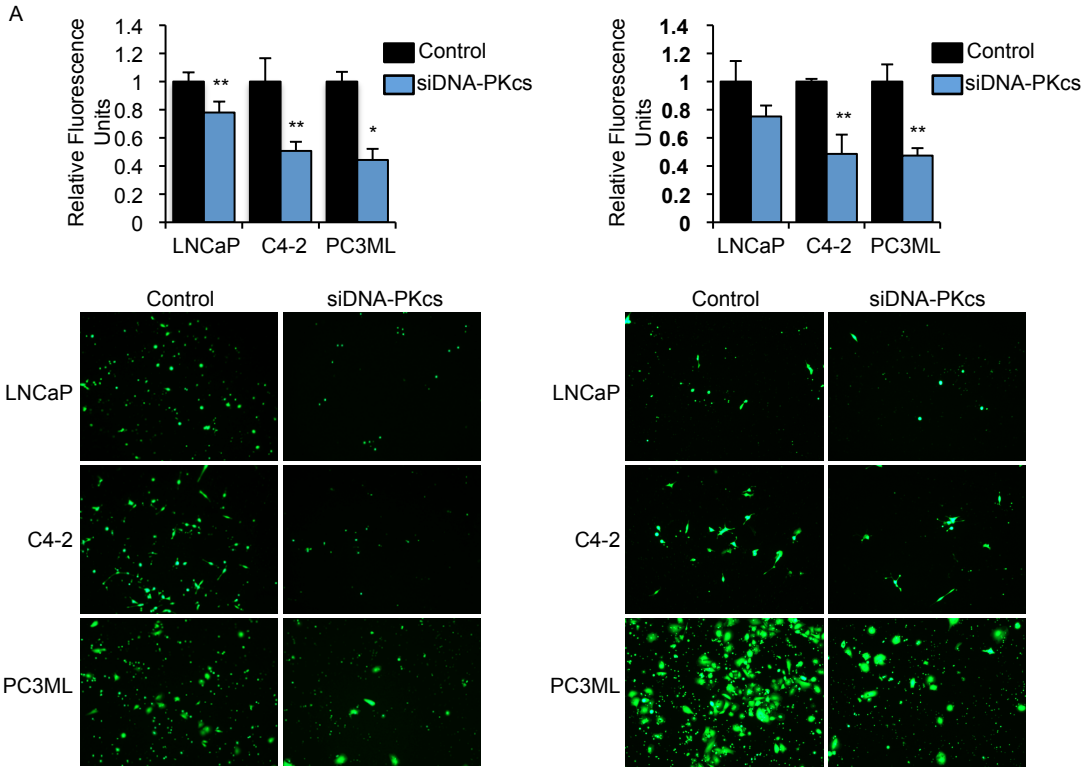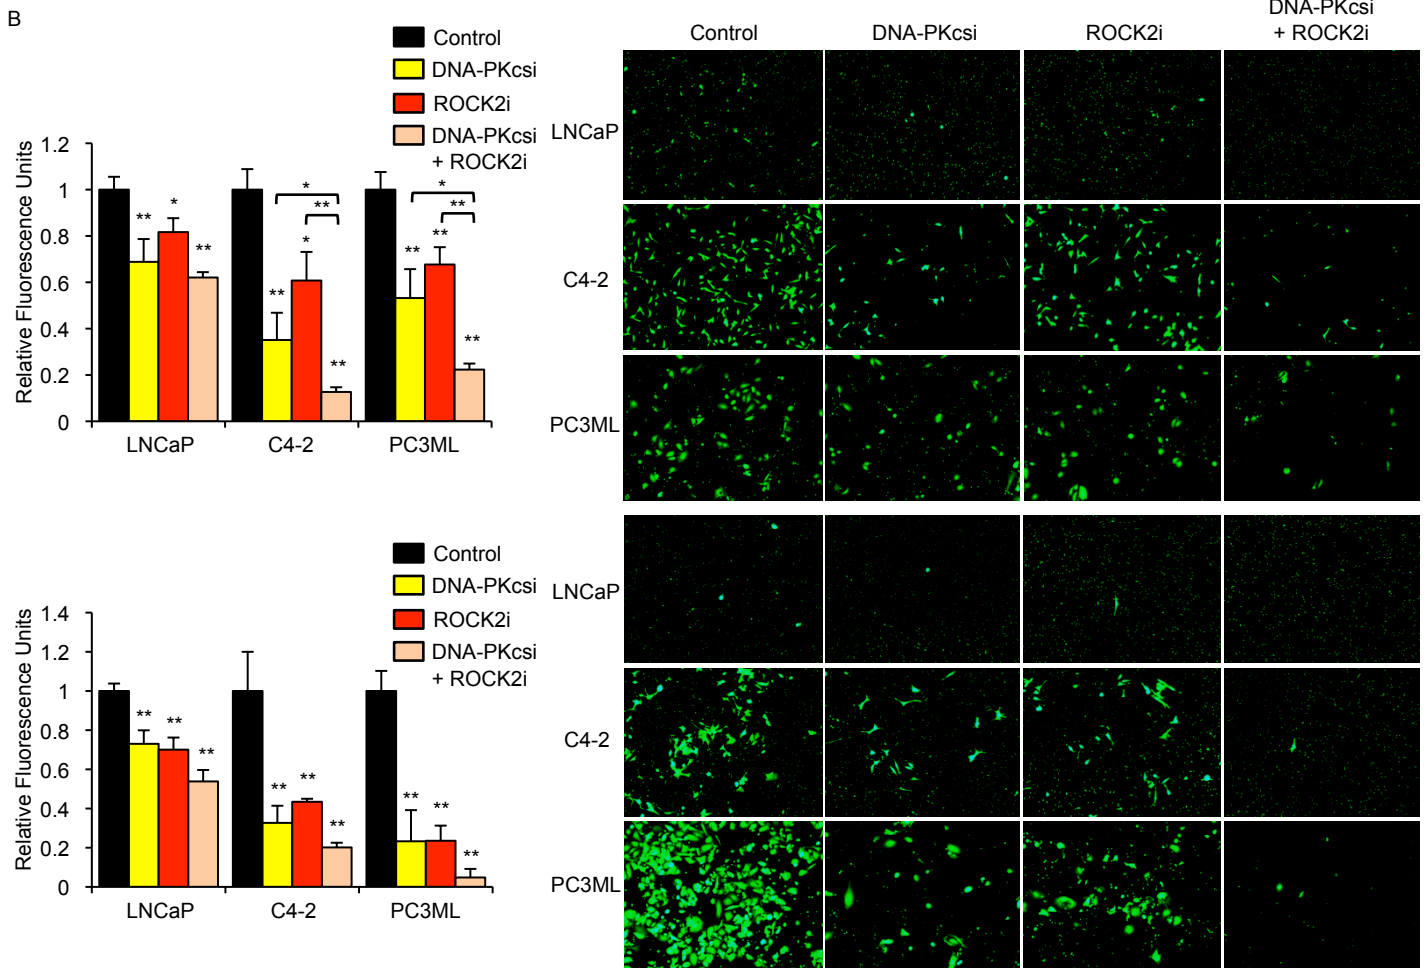

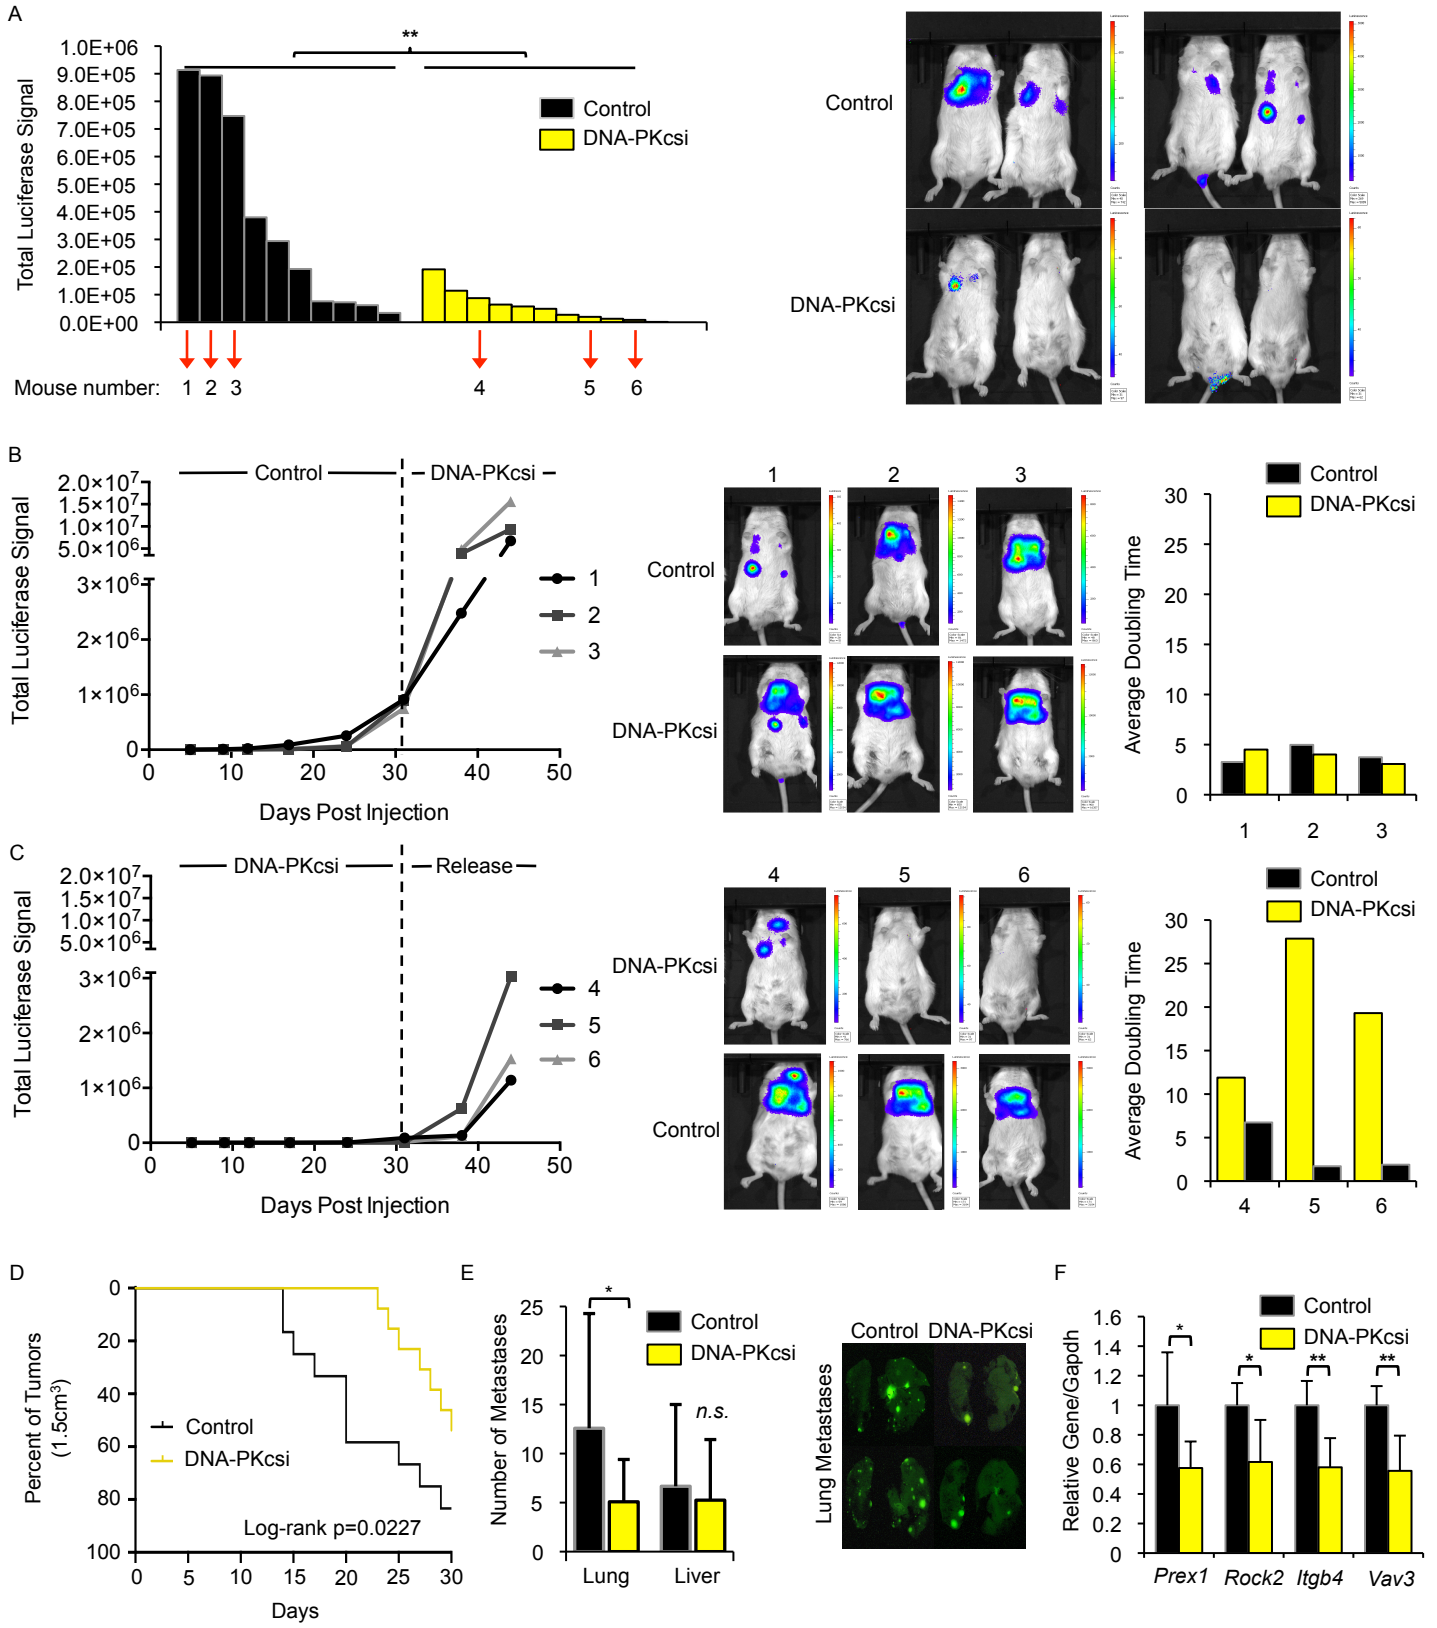

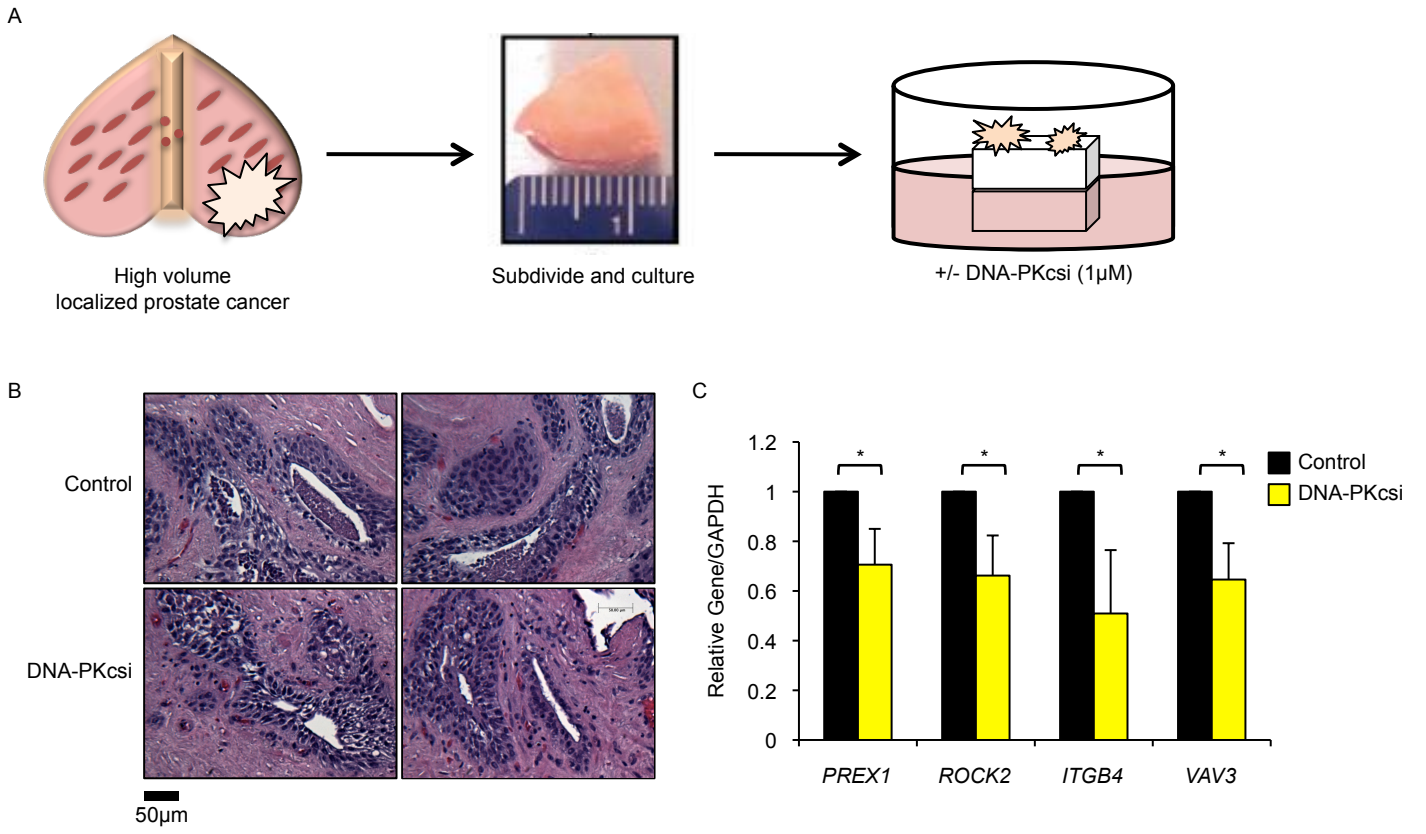

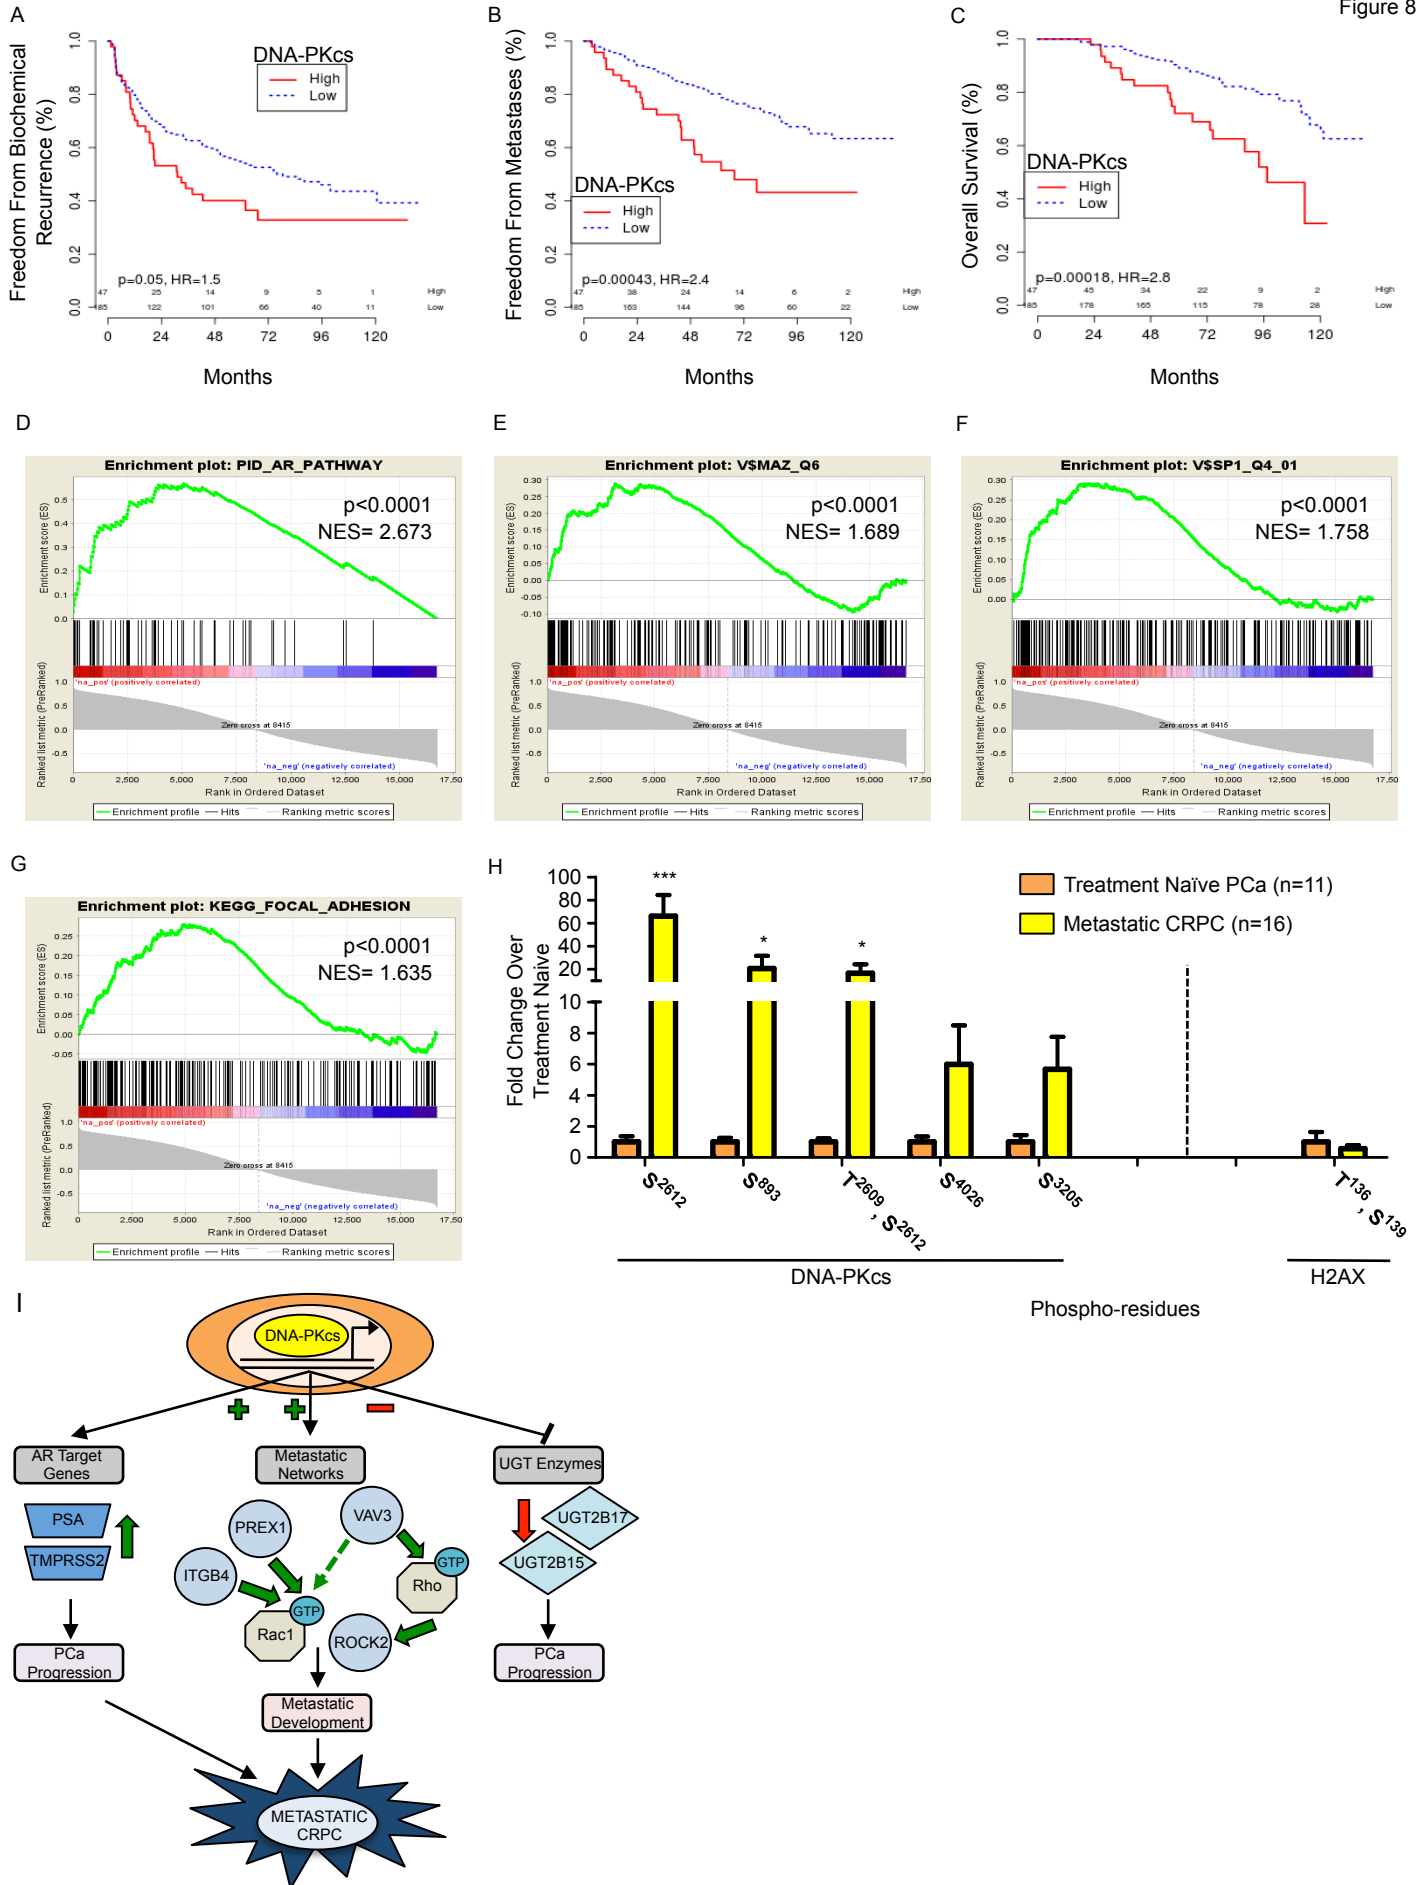

Supplement: NIHMS704948-supplement-1.pdf [file NIHMS704948-supplement-1.pdf]
